# Supplementary material
Source: PubMed Central journal article supplement (PMC3304507)
Supplement: jp211863y_si_001.pdf [file jp211863y_si_001.pdf]

## Supporting information

# Evaluation of colloids and activation agents for determination of melamine using UV-SERS

Evelyn Kämmer<sup>1,3,†</sup>      Thomas Dörfer<sup>1,3,†</sup>      Andrea Csáki<sup>3</sup>  
Wilm Schumacher<sup>1</sup>      Paulo Augusto Da Costa Filho<sup>2</sup>      Nicolae Tarcea<sup>1</sup>  
Wolfgang Fritzsche<sup>3</sup>      Petra Rösch<sup>1</sup>      Michael Schmitt<sup>1</sup>      Jürgen Popp<sup>1,3,\*</sup>

February 29, 2012

<sup>1</sup> Institute of Physical Chemistry  
and Abbe Center of Photonics  
Friedrich Schiller University  
Helmholtzweg 4, D-07743 Jena  
Germany

<sup>2</sup> Quality and Safety Department  
Nestlé Research Center  
Vers-Chez-Les-Blanc,  
1000 Lausanne 26  
Switzerland

<sup>3</sup> Institute of Photonic Technology  
Albert-Einstein-Strasse 9, 07745 Jena  
Germany  
Tel. +49(0)3641-206300

<sup>†</sup>This document is a collaborative effort of Evelyn Kämmer & Thomas Dörfer and they contributed equally to the presented work.

\*Corresponding author: [juergen.popp@uni-jena.de](mailto:juergen.popp@uni-jena.de)

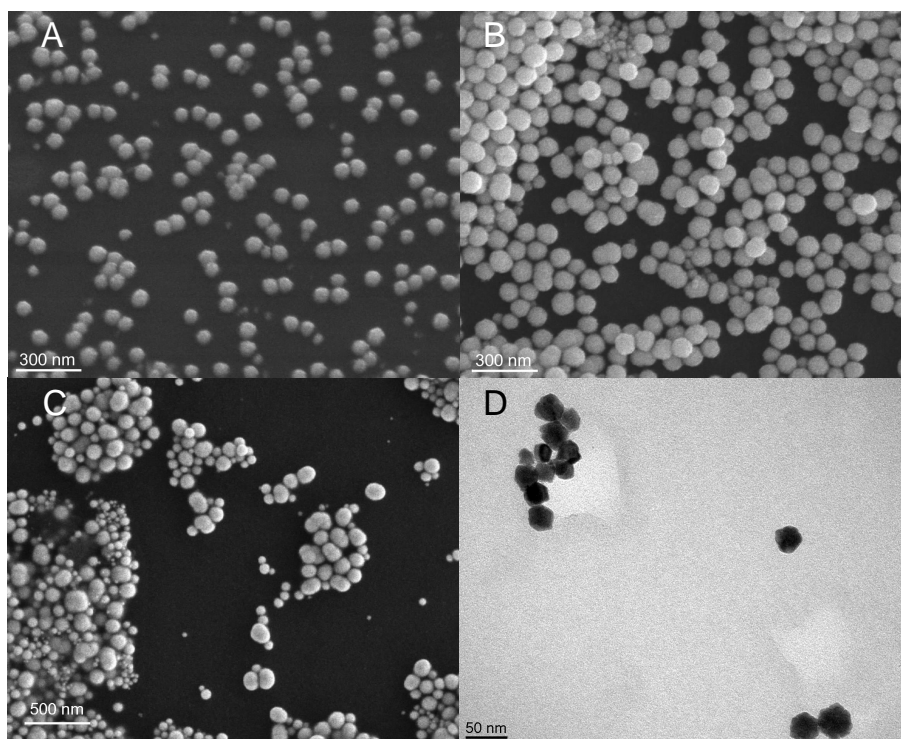

Figure S1: (A) SEM image of Pt48; (B) SEM image of Pt73; (C) SEM image of Pt107 and (D) TEM image of Pd20

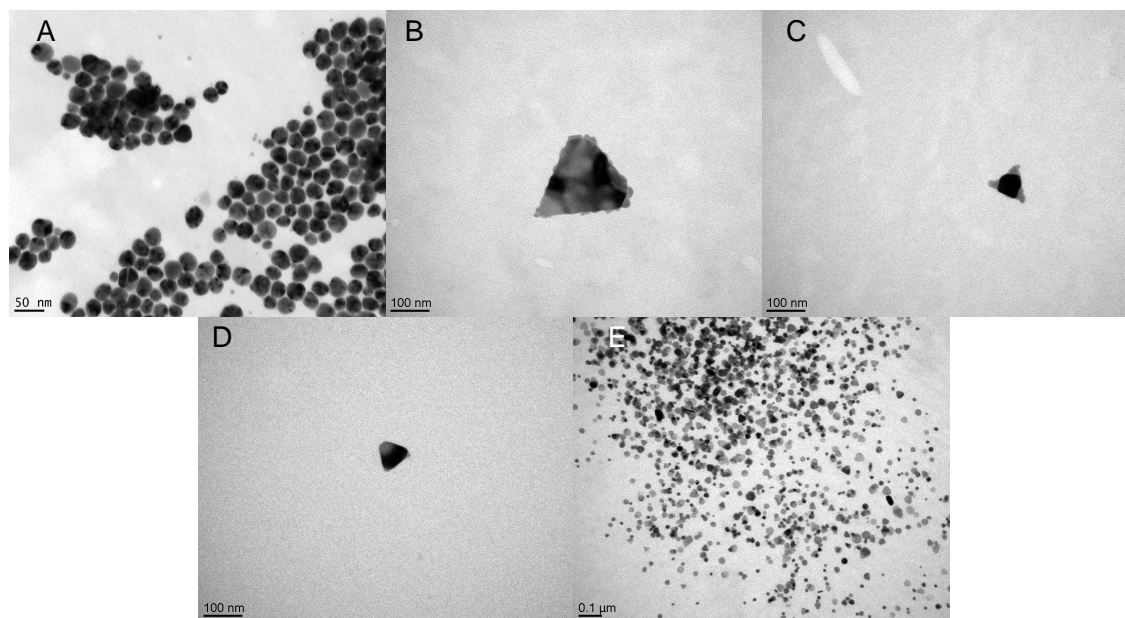

Figure S2: TEM images of (A) Ag23; (B) Ag225; (C) Ag125; (D) Ag100 and (E) Ag50

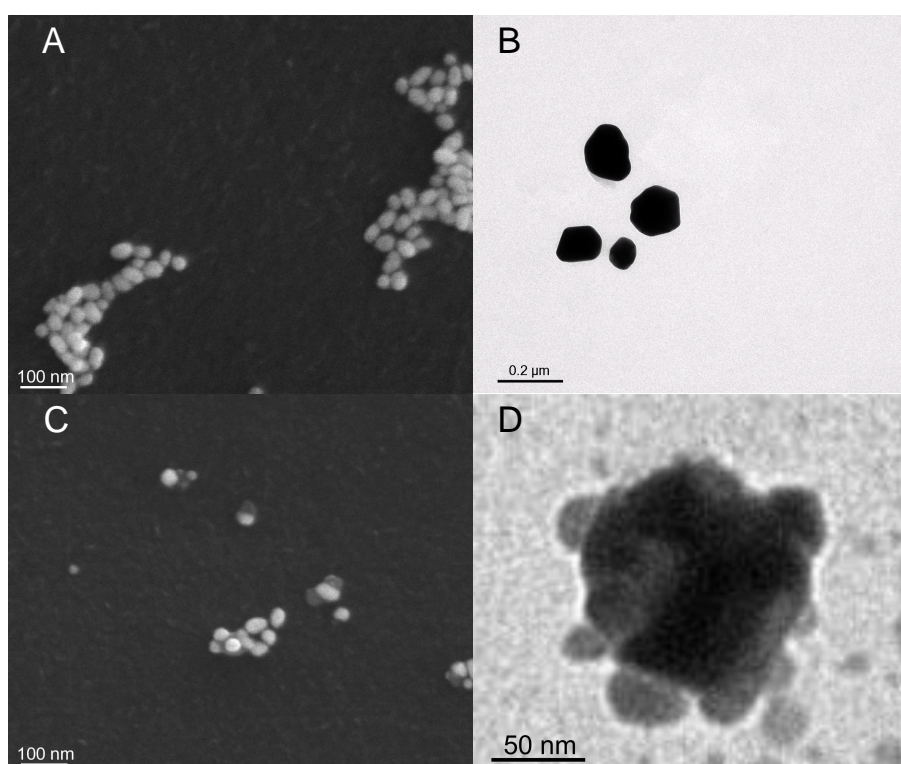

Figure S3: (A) SEM image of Au<sub>35</sub>; (B) TEM image of Au<sub>120</sub>; (C) SEM image of AuAg<sub>30</sub> and (D) TEM image of AgAu<sub>25</sub>
